# Supplementary material for: Li4Ti5O12–TiO2/MoO2 nanoclusters-embedded into carbon nanosheets core/shell porous superstructures boost lithium ion storage
Source: Royal Society of Chemistry journal article supplement (doi:10.1039/c7ta02565c), 2017-01-01
Supplement: c7ta02565c1.pdf [file c7ta02565c1.pdf]

## *Supporting Information*

### **Li<sub>4</sub>Ti<sub>5</sub>O<sub>12</sub>-TiO<sub>2</sub>/MoO<sub>2</sub> Nanoclusters-Embedded into Carbon Nanosheets Core/Shell Porous Superstructures Boost Lithium Ion Storage**

Yong Yang,<sup>a</sup> Shitong Wang,<sup>b</sup> Mingchuan Luo,<sup>a</sup> Wei Wang,<sup>a</sup> Fan Lv,<sup>a</sup> Zilong Tang,<sup>b\*</sup> Shaojun Guo<sup>a, c, d\*</sup>

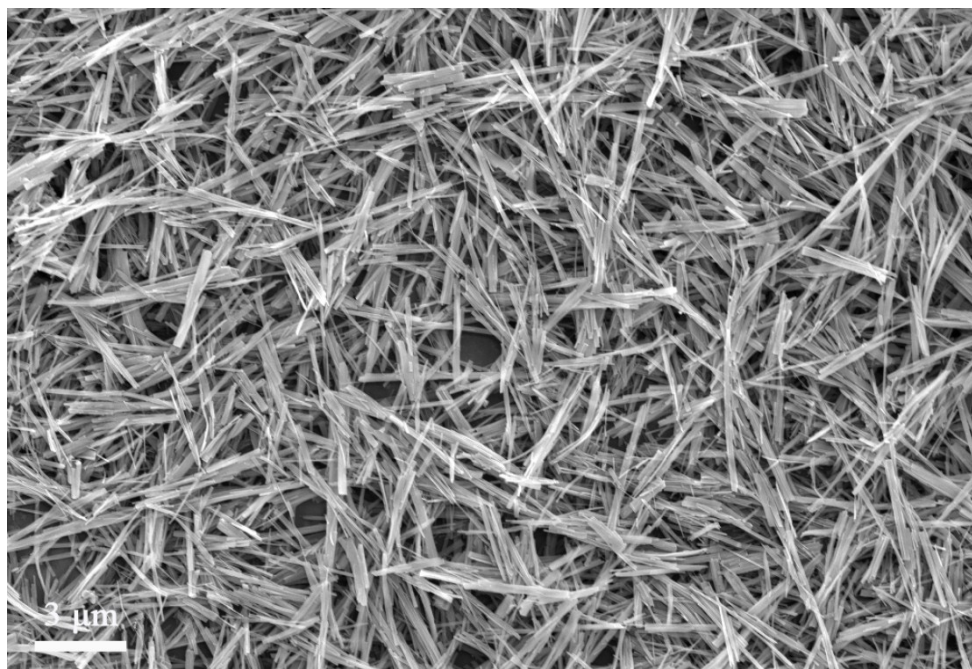

Figure S1. SEM image of LHTO-NWs.

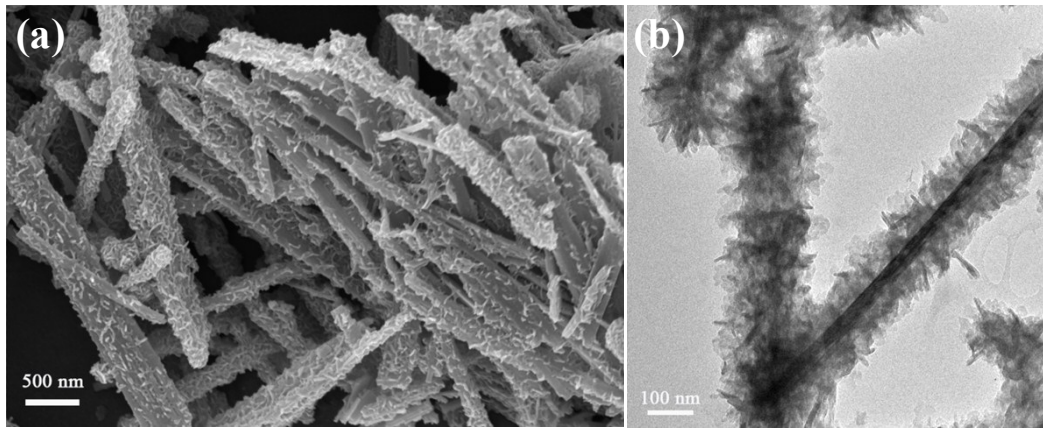

Figure S2. (a-b) SEM and TEM images of as-prepared LHTO/Mo-PDA core/shell composites.

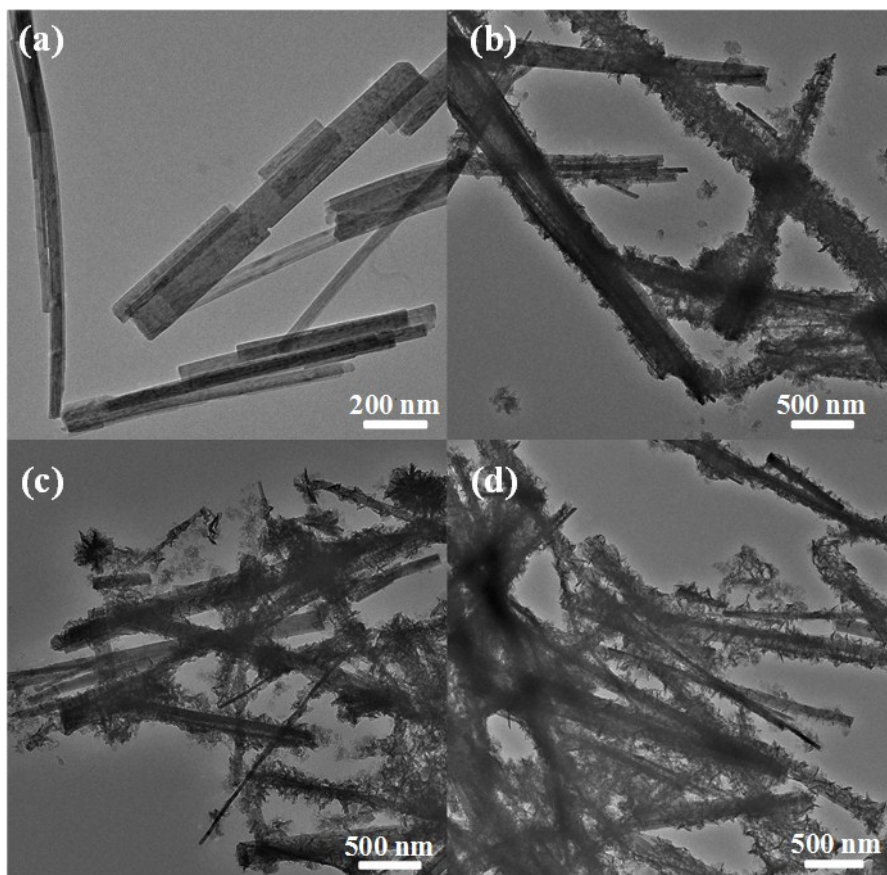

Figure S3. TEM images of LTO-TO@MoO<sub>2</sub>/C at different times. (a) 0 h; (b) 1 h; (c) 3 h; (d) 6 h.

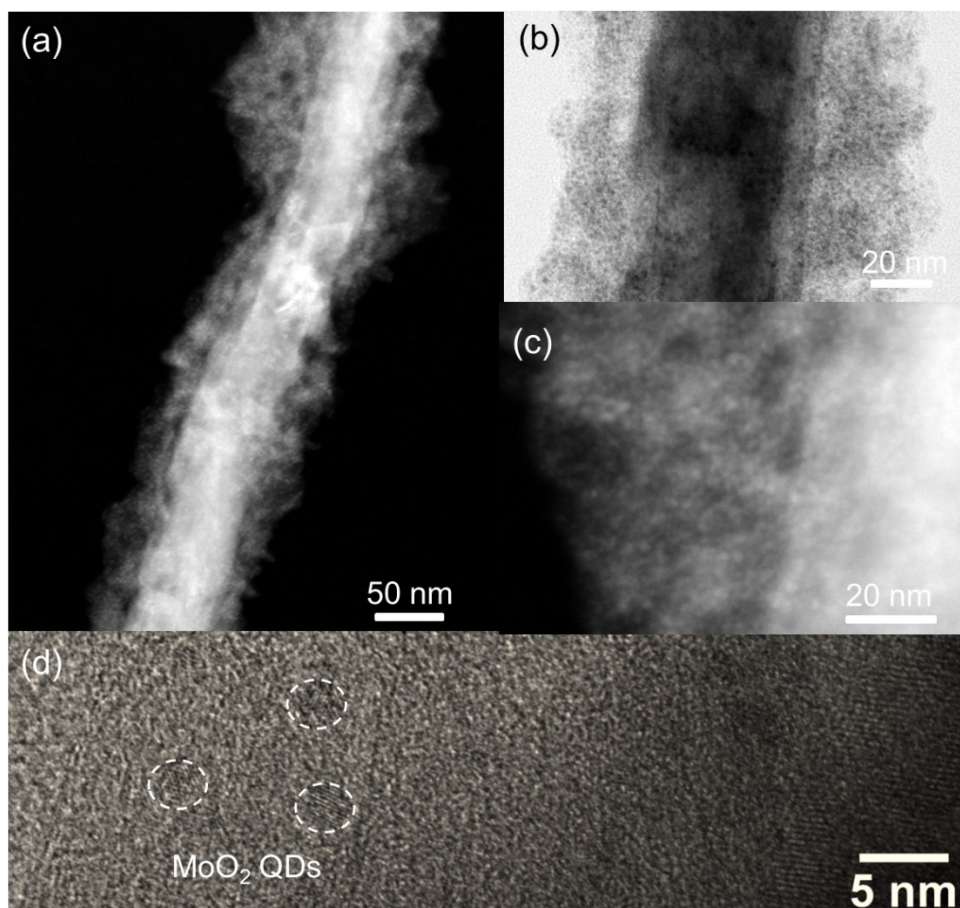

Figure S4. (a, c) STEM and (b, d) HRTEM images of LTO-TO@MoO<sub>2</sub>/C.

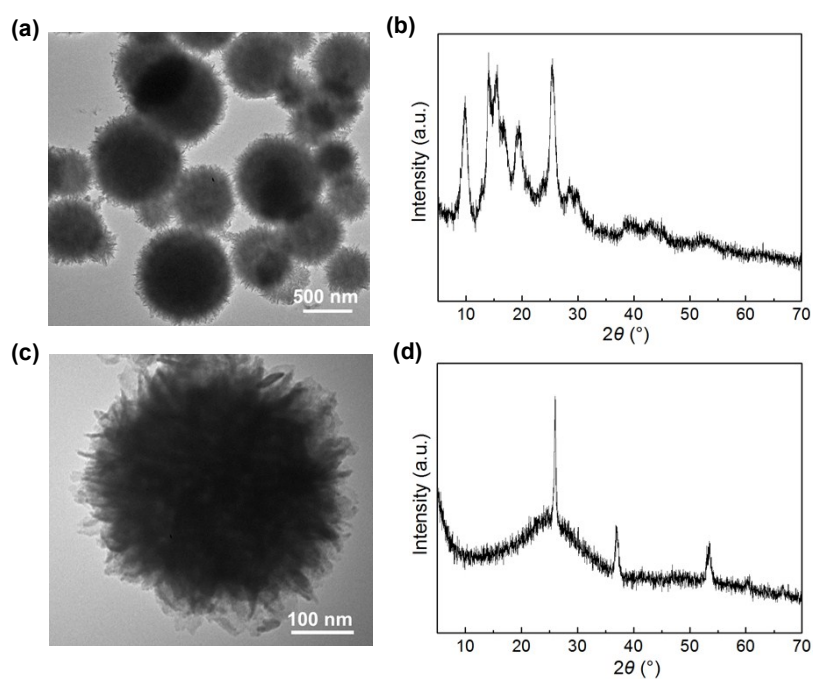

Figure S5. (a) TEM image and (b) XRD pattern of solid Mo-PDA nanospheres; (c) TEM image and (d) XRD pattern of MoO<sub>2</sub>/C nanospheres.

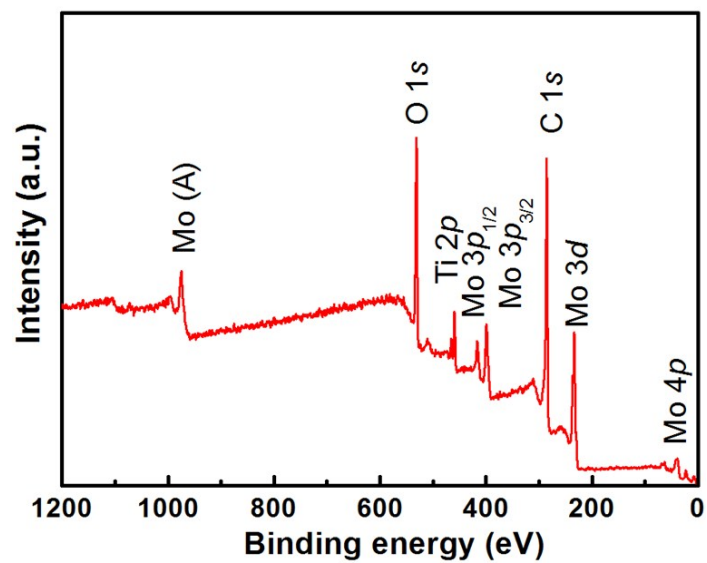

Figure S6. XPS spectrum of as-prepared LTO-TO@MoO<sub>2</sub>/C composite.

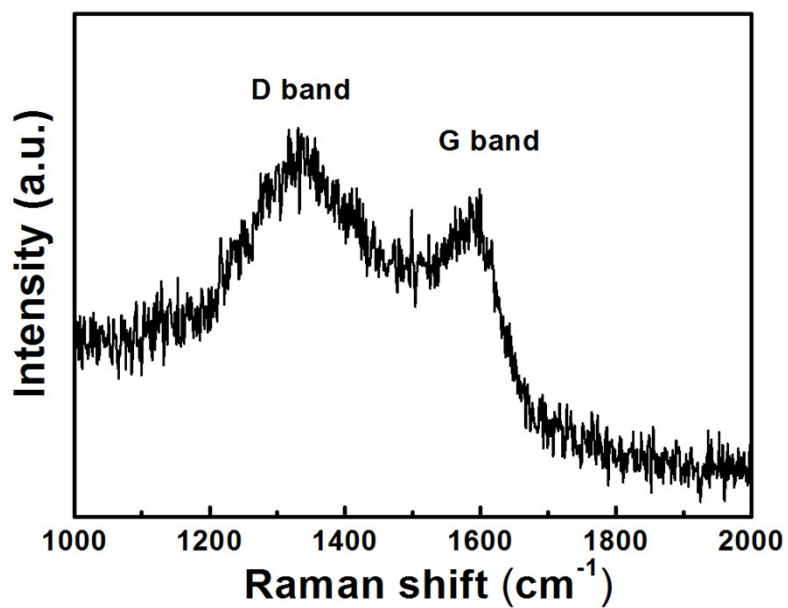

Figure S7. Raman spectrum of the as-prepared LTO-TO@MoO<sub>2</sub>/C composite.

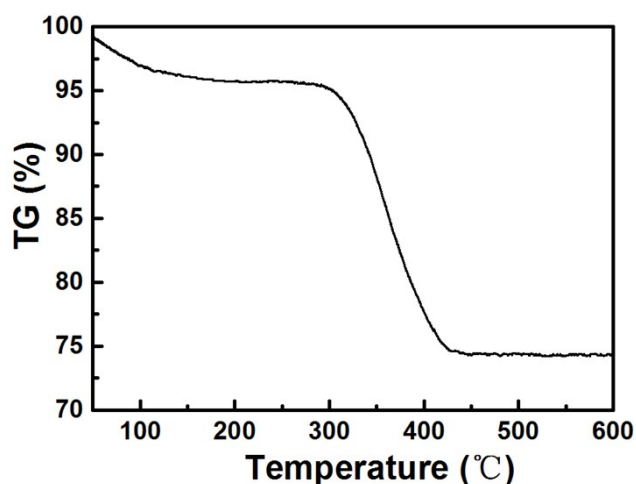

Figure S8. TG curve of the LTO-TO@MoO<sub>2</sub>/C composite from 100 to 600 °C under air gas flow with a temperature ramp of 10 °C min<sup>-1</sup>. The final weight loss of TiO<sub>2</sub>@MoO<sub>2</sub>/C was caused by carbon decomposition in air ( $C + O_2 \rightarrow CO_2$ ) and the oxidation of MoO<sub>2</sub> ( $MoO_2 + O_2 \rightarrow MoO_3$ ).

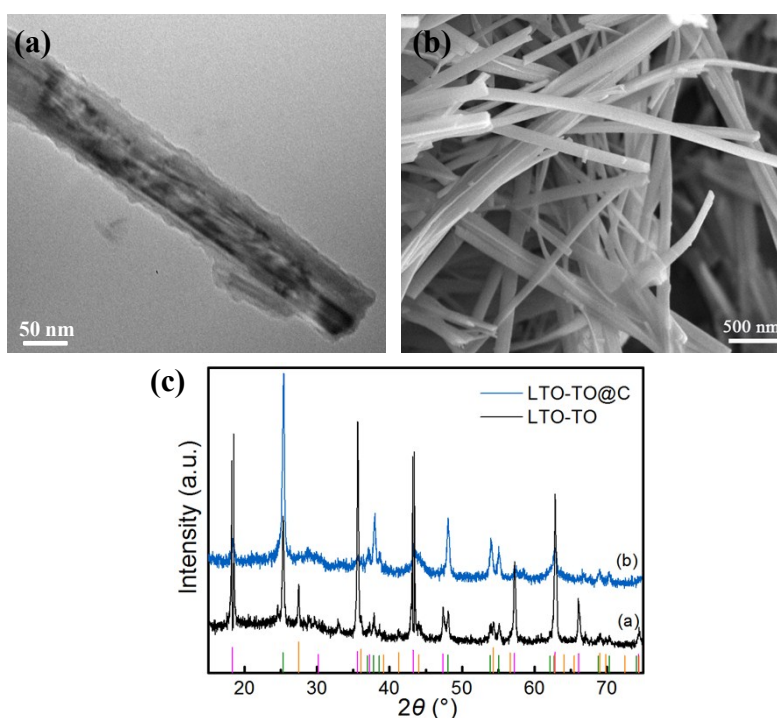

Figure S9. (a) TEM image of as-prepared LTO-TO@C composites. (b) SEM image of LTO-TO composites. (c) XRD patterns of LTO-TO@C and LTO-TO. Compared with the peak intensity of LTO-TO@C and LTO-TO, the relative intensity of Li<sub>4</sub>Ti<sub>5</sub>O<sub>12</sub> to TiO<sub>2</sub> in LTO-TO@MoO<sub>2</sub>/C composite is minimum. The possible reason for the variable Li/Ti ratio was attributed to the consumption of Li<sub>4</sub>Ti<sub>5</sub>O<sub>12</sub> during the fabrication of Li<sub>1.81</sub>H<sub>0.19</sub>Ti<sub>2</sub>O<sub>5</sub>·H<sub>2</sub>O@Mo-PDA due to the weak alkaline environment.

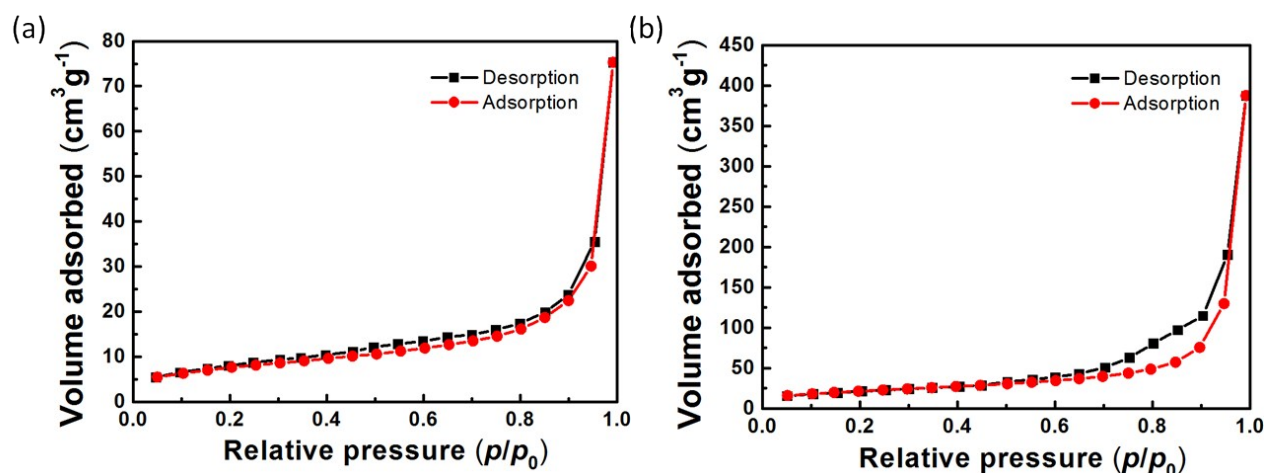

Figure S10. N<sub>2</sub> adsorption/desorption isotherms of (a) LTO-TO@C and (b) LTO-TO.

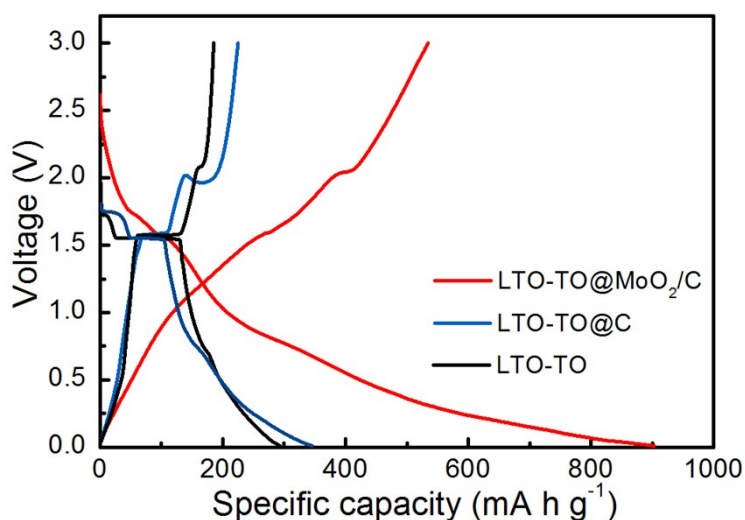

Figure S11. The first charge–discharge profiles of the LTO-TO@MoO<sub>2</sub>/C, LTO-TO@C and LTO-TO at 100 mA g<sup>-1</sup>. The charge and discharge capacities for LTO-TO@MoO<sub>2</sub>/C are 534.5 and 903.3 mAh g<sup>-1</sup>, respectively, with a Coulombic efficiency of 60 %. The charge and discharge capacities for LTO-TO@C are 224.8 and 345.4 mAh g<sup>-1</sup>, respectively, with a Coulombic efficiency of 65 %. The charge and discharge capacities for LTO-TO are 185.2 and 293.2 mAh g<sup>-1</sup>, respectively, with a Coulombic efficiency of 63 %.

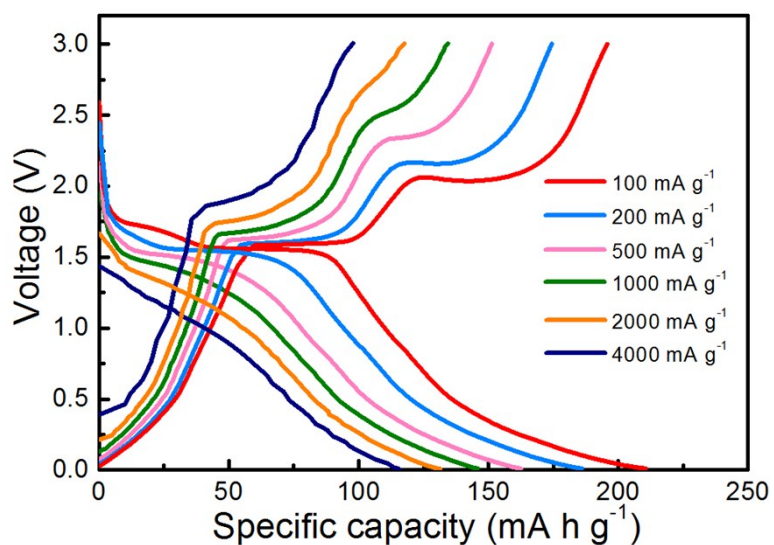

Figure S12. Galvanostatic charge–discharge profiles of the LTO-TO@C electrode at different current densities.

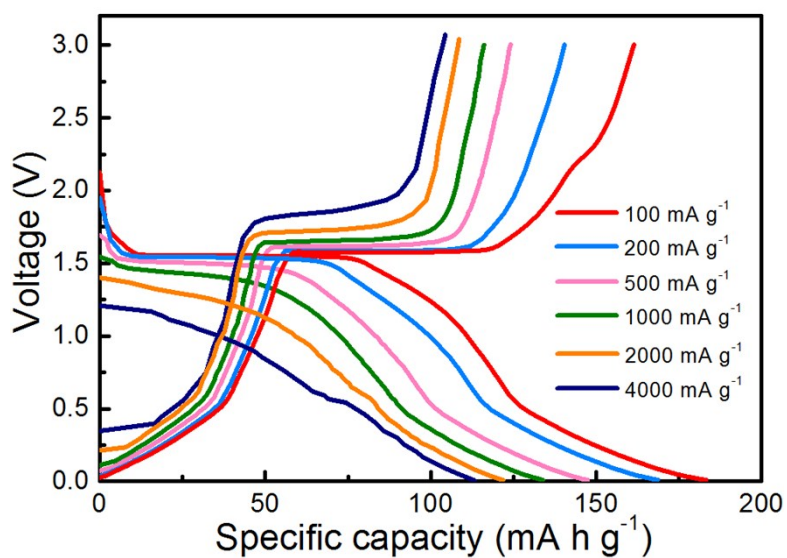

Figure S13. Galvanostatic charge–discharge profiles of the LTO-TO electrode at different current densities.

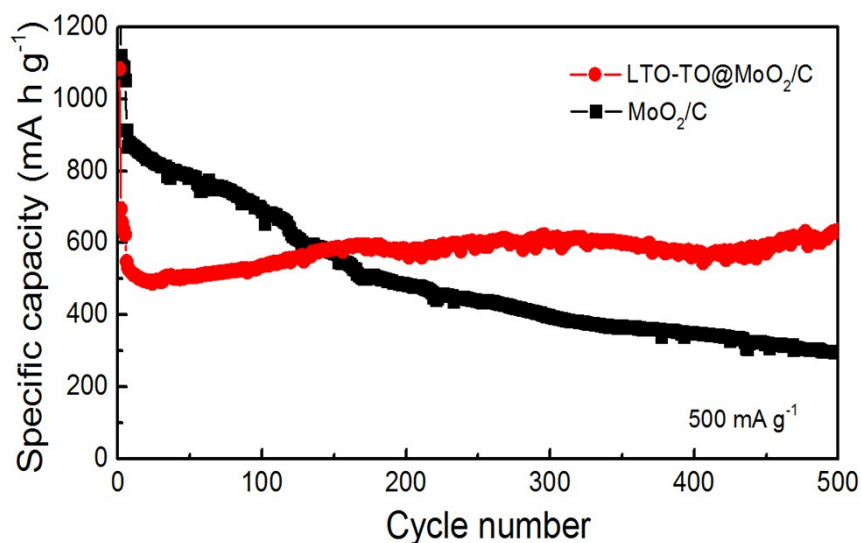

Figure S14 Cycling performances for LTO-TO@MoO<sub>2</sub>/C and MoO<sub>2</sub>/C at 500 mA g<sup>-1</sup>.

In order to show the synthetic effect of composites, we also compared the electrochemical performance of the MoO<sub>2</sub>/C composites (Fig. S14). The MoO<sub>2</sub>/C nanospheres were synthesized via the same method without adding the LHTO-NWs and keeping the other heating experimental variables fixed (Fig. S5). It was found that the specific capacity of MoO<sub>2</sub>/C drops rapidly during its whole cycle life, with the capacity retention of only 32% after 500 cycles. As a contrast the LTO-TO@MoO<sub>2</sub>/C shows better stability than MoO<sub>2</sub>/C. The specific capacity of LTO-TO@MoO<sub>2</sub>/C even increases gradually up to 600 mAh g<sup>-1</sup> after 500 cycles, further demonstrating its high stability.



**Table S1. Comparison of this work with previously reported Ti-based composites.** Their electrode compositions are listed using the mass ratio of active materials: conductive carbon: binder.

| Electrode materials                                                                                     | Electrode compositions | Loading density (mg cm <sup>-2</sup> ) | Capacity after cycles (mAh g <sup>-1</sup> )    | Ref.             |
|---------------------------------------------------------------------------------------------------------|------------------------|----------------------------------------|-------------------------------------------------|------------------|
| <b>Li<sub>4</sub>Ti<sub>5</sub>O<sub>12</sub>-TiO<sub>2</sub>@MoO<sub>2</sub>/C 3D heterostructures</b> | <b>80:10:10</b>        | <b>~1.0</b>                            | <b>413, 500 cycles (1000 mA g<sup>-1</sup>)</b> | <b>This work</b> |
| Li <sub>4</sub> Ti <sub>5</sub> O <sub>12</sub> /TiO <sub>2</sub>                                       | 75:15:10               | N/A                                    | 139, 100 cycles (1000 mA g <sup>-1</sup> )      | [1]              |
| Li <sub>4</sub> Ti <sub>5</sub> O <sub>12</sub> /MoS <sub>2</sub>                                       | 80:10:10               | 0.9-1.8                                | ~160, 1000 cycles (10 C)                        | [2]              |
| Li <sub>4</sub> Ti <sub>5</sub> O <sub>12</sub> /TiO <sub>2</sub> /C                                    | 80:10:10               | 2-3                                    | 101, 200 cycles (2000 mA g <sup>-1</sup> )      | [3]              |
| Li <sub>4</sub> Ti <sub>5</sub> O <sub>12</sub> /NiO                                                    | 80:10:10               | N/A                                    | 176, 100 cycles (1C)                            | [4]              |
| Li <sub>4</sub> Ti <sub>5</sub> O <sub>12</sub> /rGO                                                    | 80:10:10               | N/A                                    | 187, 100 cycles (1C)                            | [5]              |
| Li <sub>4</sub> Ti <sub>5</sub> O <sub>12</sub> -TiO <sub>2</sub> -Sn/C                                 | 80:10:10               | ~1.0                                   | 360, 600 cycles (1000 mA g <sup>-1</sup> )      | [6]              |
| Li <sub>4</sub> Ti <sub>5</sub> O <sub>12</sub> /Sn                                                     | 85:9:8                 | N/A                                    | 295, 30 cycles (0.02 C)                         | [7]              |
| Li <sub>4</sub> Ti <sub>5</sub> O <sub>12</sub> -Sn                                                     | 80:10:10               | N/A                                    | 224, 50 cycles (100 mA g <sup>-1</sup> )        | [8]              |
| Li <sub>4</sub> Ti <sub>5</sub> O <sub>12</sub> /Sb/C                                                   | 70:20:10               | ~2                                     | 236, 500 cycles (200 mA g <sup>-1</sup> )       | [9]              |
| Li <sub>4</sub> Ti <sub>5</sub> O <sub>12</sub> /Co <sub>3</sub> O <sub>4</sub>                         | 80:10:10               | N/A                                    | ~300, 50 cycles (160 mA g <sup>-1</sup> )       | [10]             |
| α-Fe <sub>2</sub> O <sub>3</sub> @Li <sub>4</sub> Ti <sub>5</sub> O <sub>12</sub>                       | 80:10:10               | N/A                                    | 249, 30 cycles (100 mA g <sup>-1</sup> )        | [11]             |
| SnO <sub>2</sub> @Li <sub>4</sub> Ti <sub>5</sub> O <sub>12</sub>                                       | 80:10:10               | N/A                                    | 457, 30 cycles (100 mA g <sup>-1</sup> )        | [12]             |

## References:

- [1] Y. M. Jiang, K. X. Wang, H. J. Zhang. et al., *Sci. Rep.* **2011**, 3, 3490.
- [2] G. Xu, L. Yang, X. Wei. et al., *Adv.Funct.Mater.* **2016**, 26, 3349-3358.
- [3] W. Zhu, H. Yang, W. Zhang. et al., *RSC Adv.*, **2015**,5, 74774-74782.
- [4] C. Zhang, D. Shao, Q. Gao, Y. Lu, Z. Liu, X. Yu, Y. Fang, D. Chen, *J. Solid State Electr.* **2015**, 19, 1859-1866.
- [5] C. Chen, Y. Huang, H. Zhang. et al., *J. Power Sources.* **2015**, 278, 693-702.
- [6] S. Wang, Y. Yang, C. Jiang, et al., *J. Mater. Chem. A*, **2016**, 4, 12714-12719.
- [7] A.Sivashanmugam, S.Gopukumar, R. Thirunakaran, et al., *Mater. Res. Bull.* **2011**, 46, 492-500.
- [8] R. Cai, X. Yu, X. Liu, Z. Shao, *J. Power Sources.* **2010**, 195, 8244-8250.
- [9] T. Zeng, X. Hu, P. Ji, et al., *Electrochimica Acta.* **2016**, 217, 299-309.
- [10] J. Hong, R. Oh, K. Ryu, *J. Electrochem. Soc.* **2015**, 162, 1978-1983.
- [11] M. Chen, W. Li, X. Shen, G. Diao, *Acs Appl. Mater. Inter.* **2014**, 6, 4514-4523.
- [12] G. Ji, Y. Ma, B. Ding, J. Y. Lee, *Chem. Mater.* **2012**, 24, 3329-3334.
